# Supplementary material
Source: PubMed Central journal article supplement (PMC2045067)

**A**

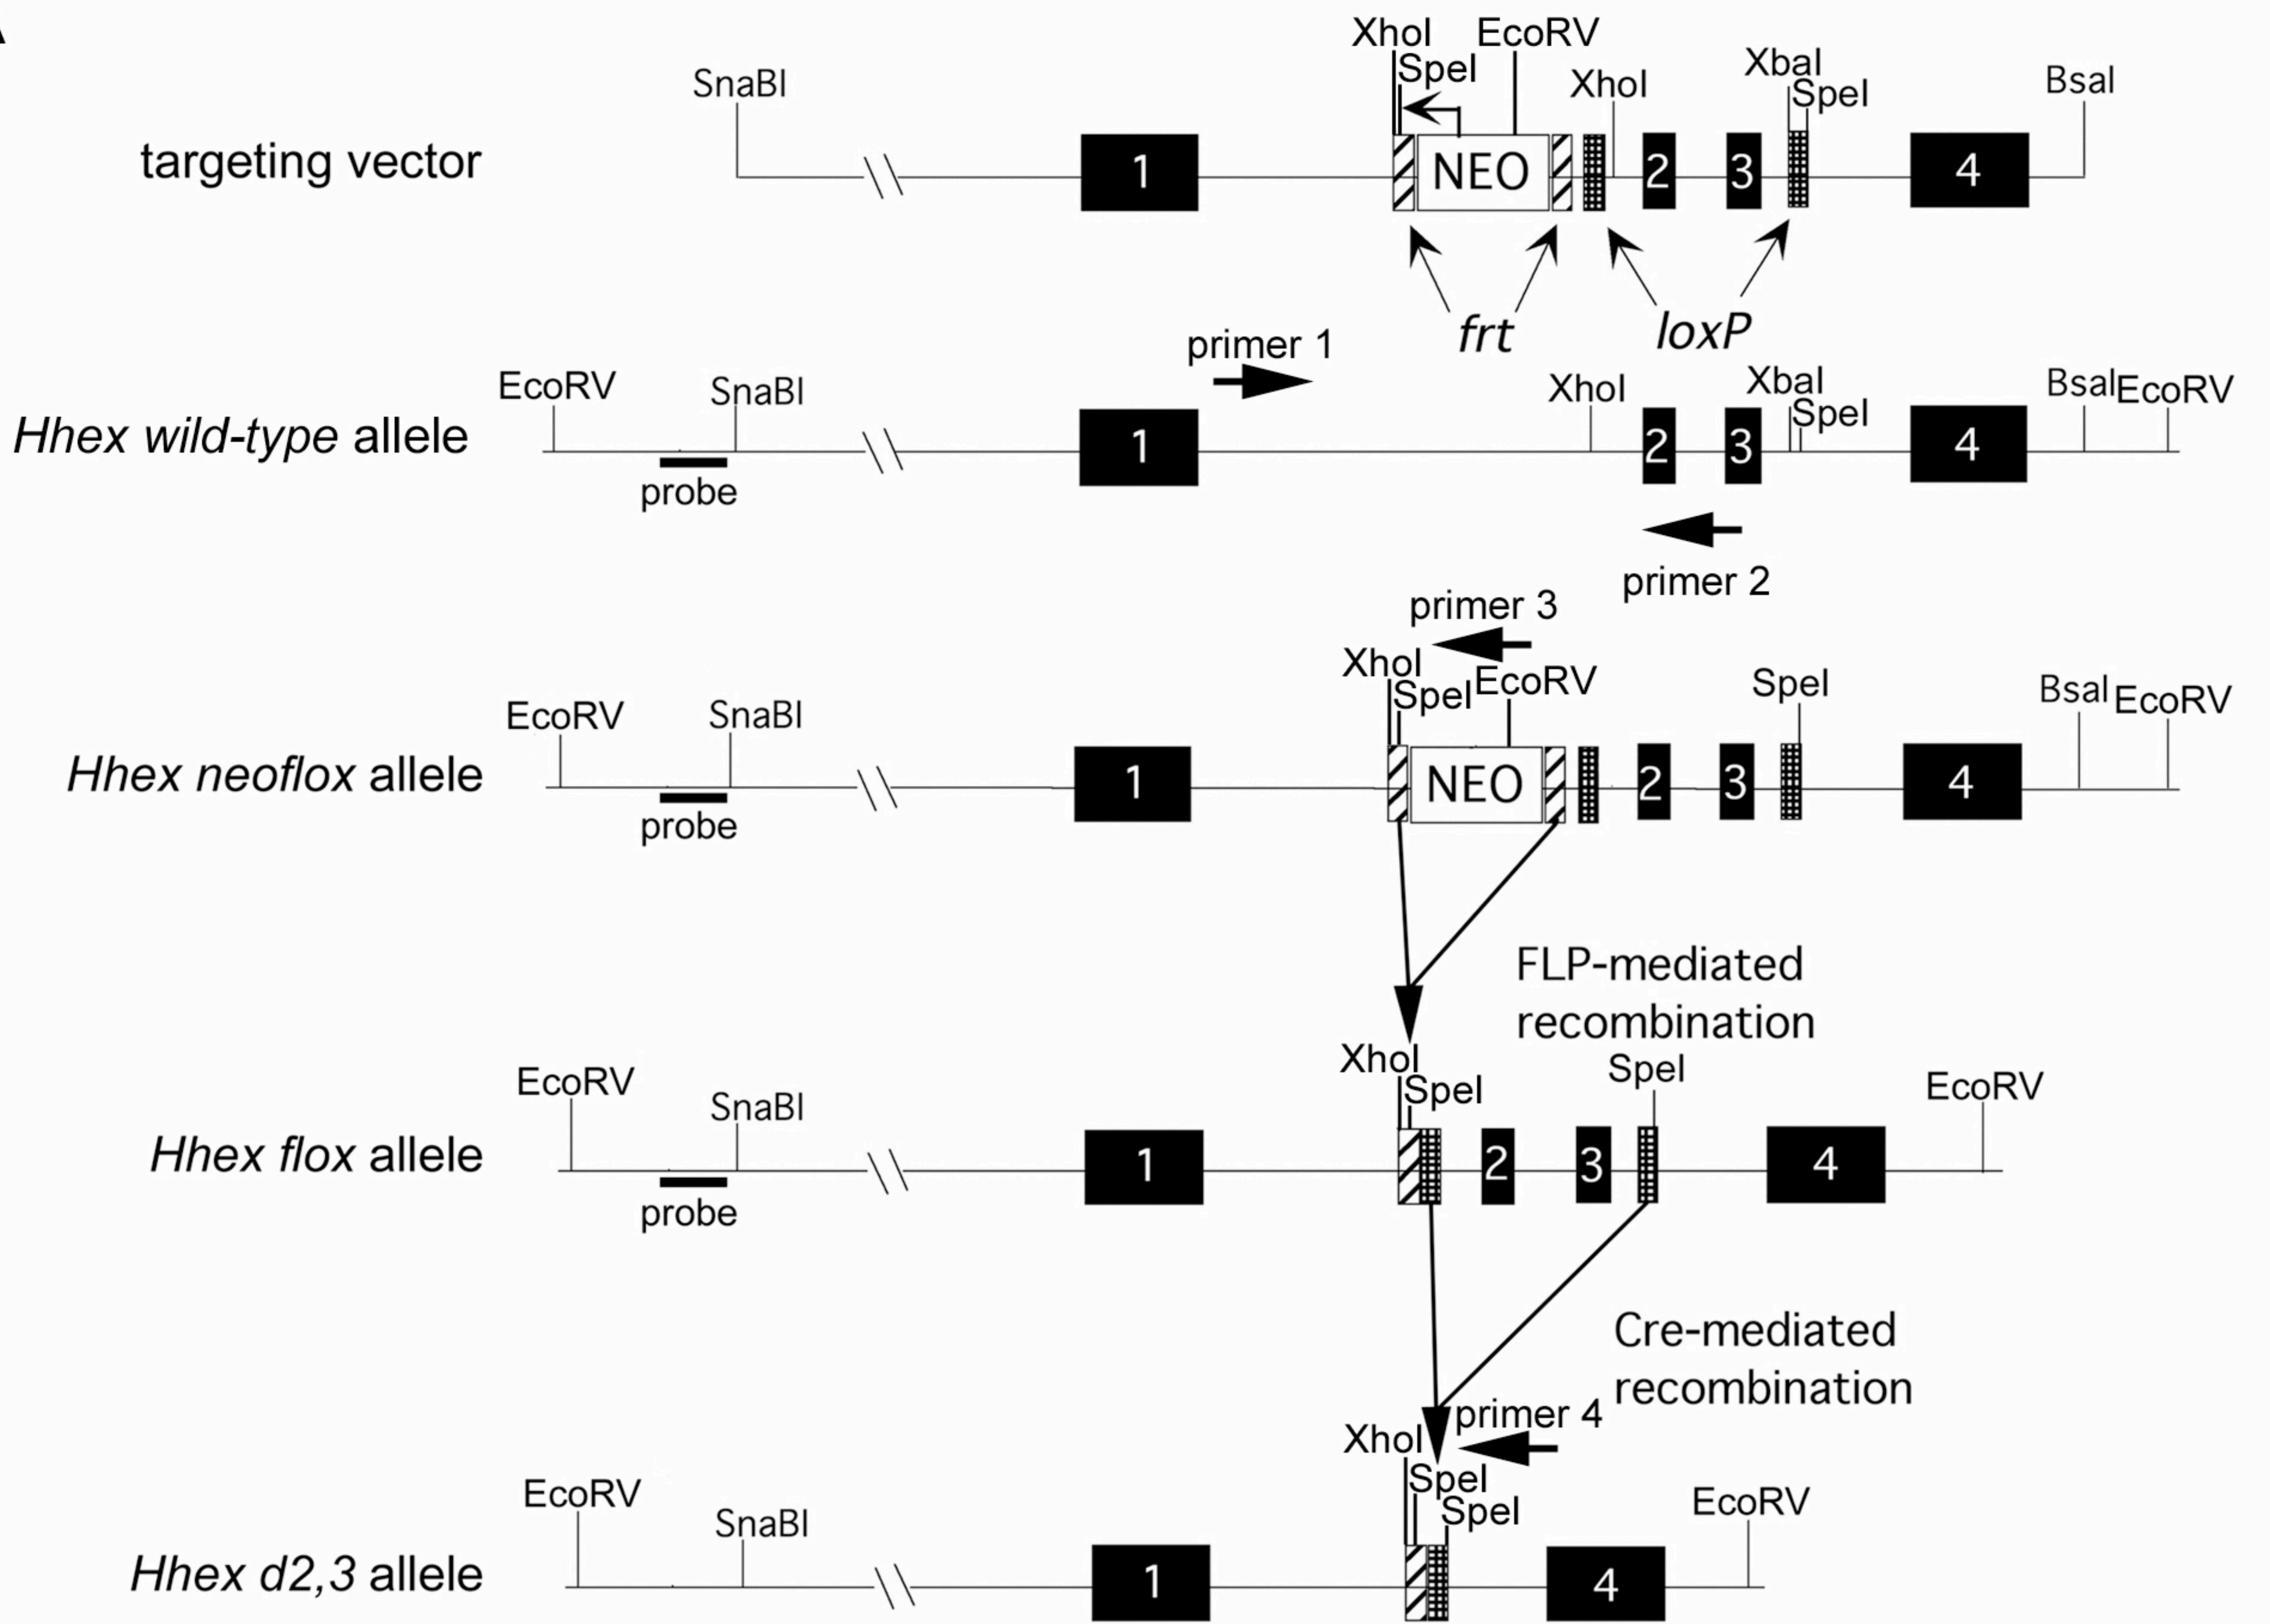

**B**

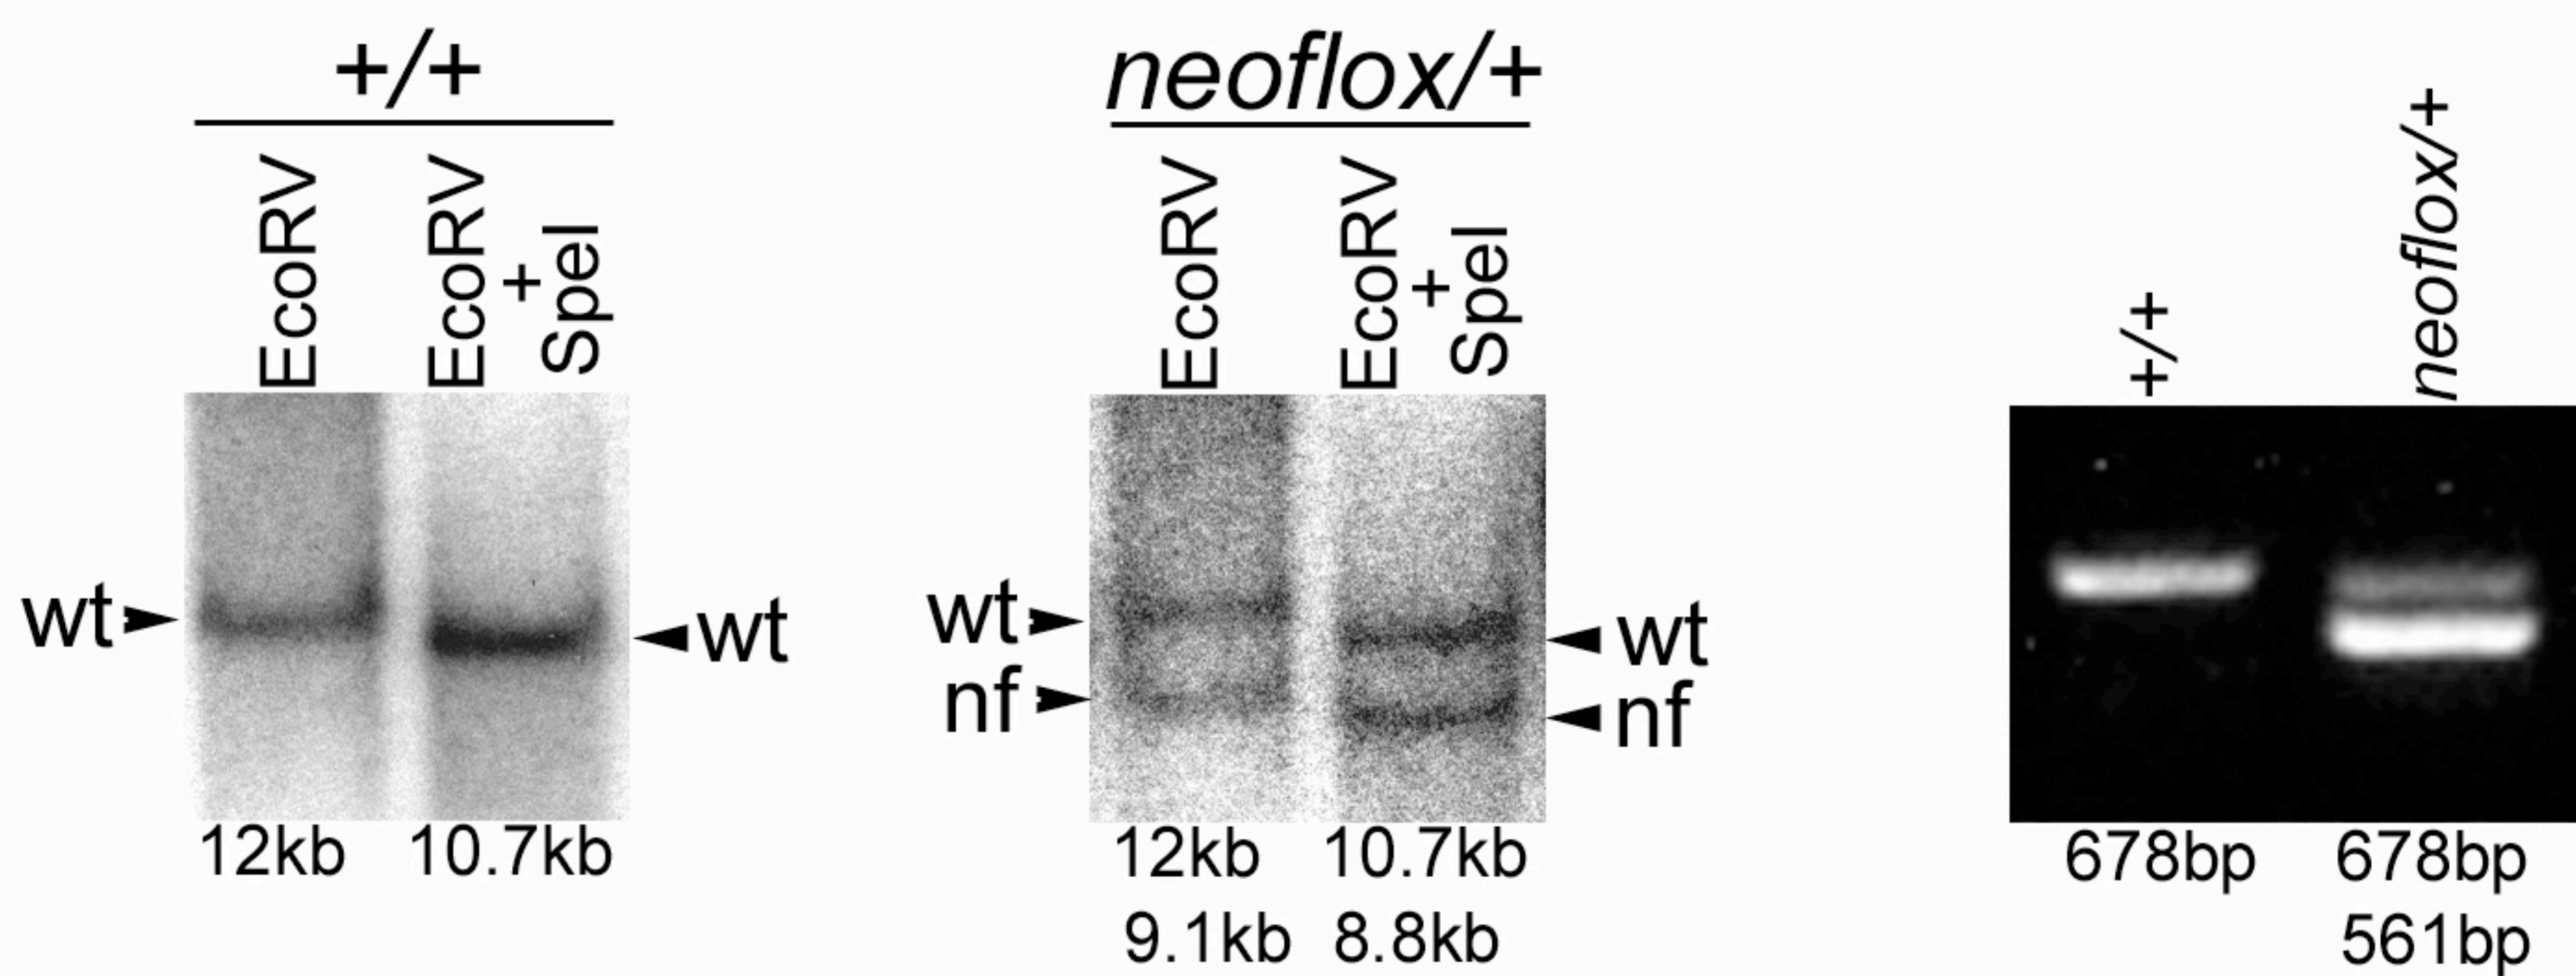

**C**

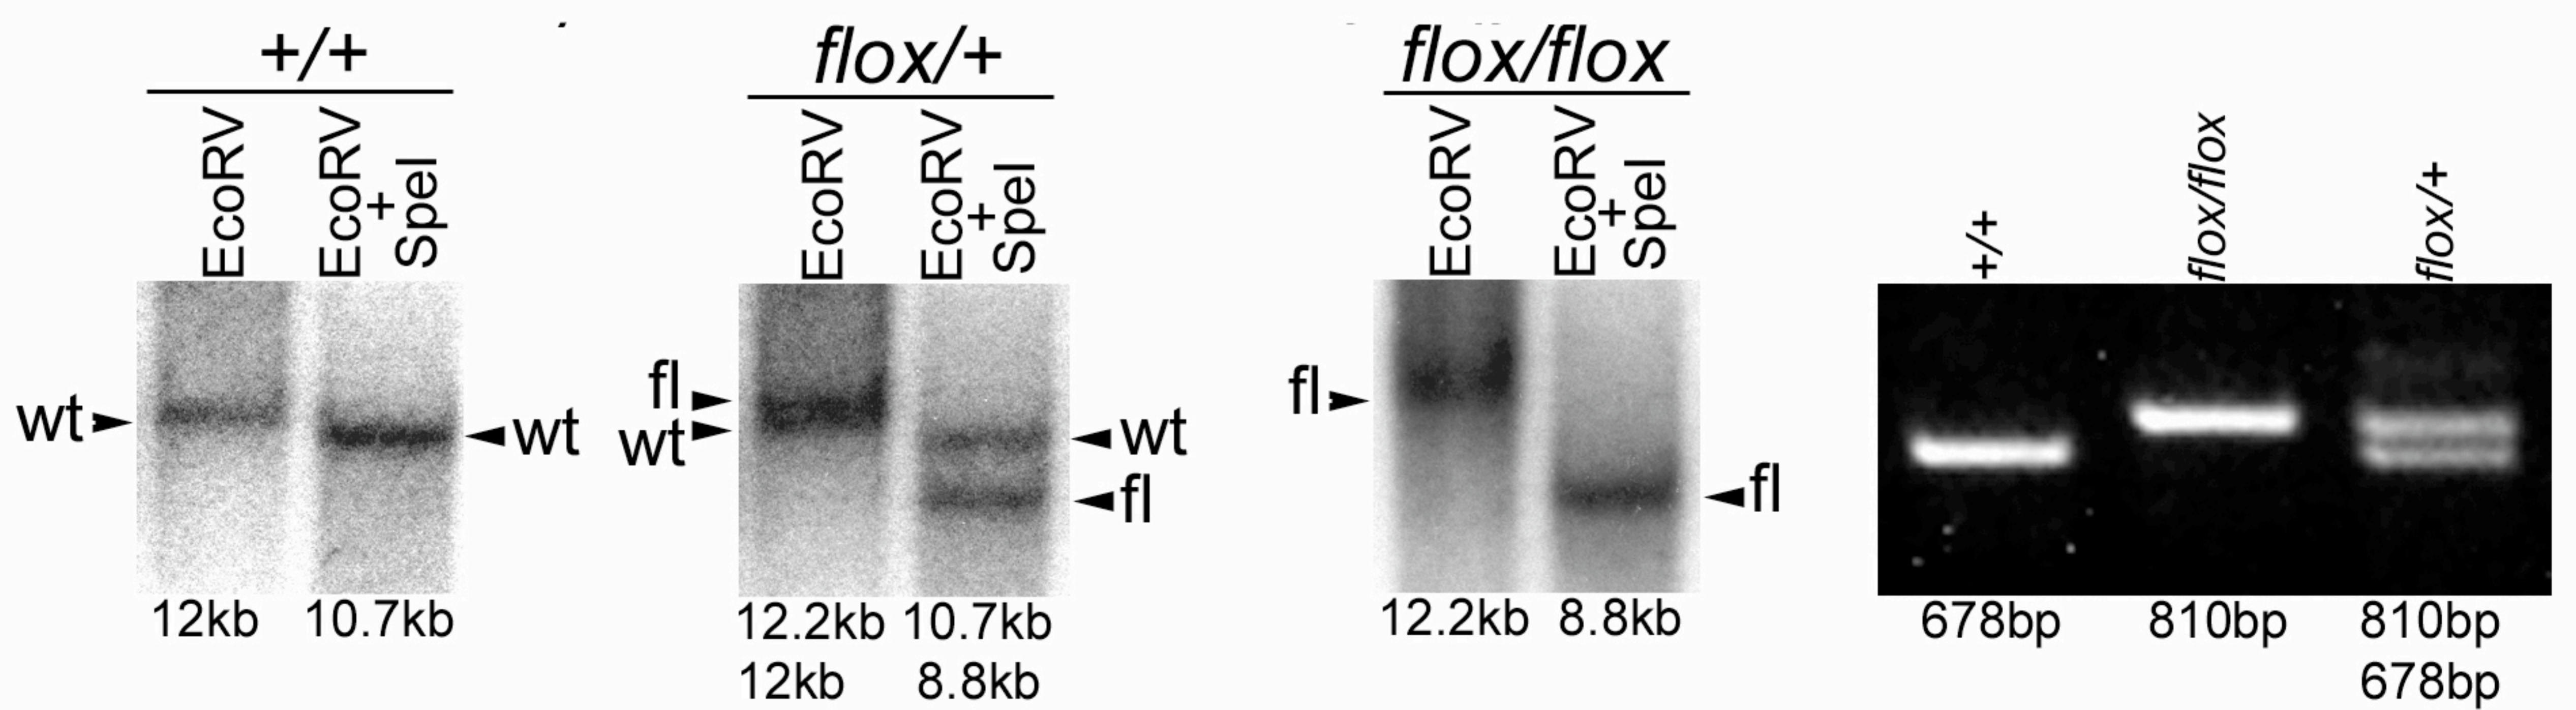

**D**

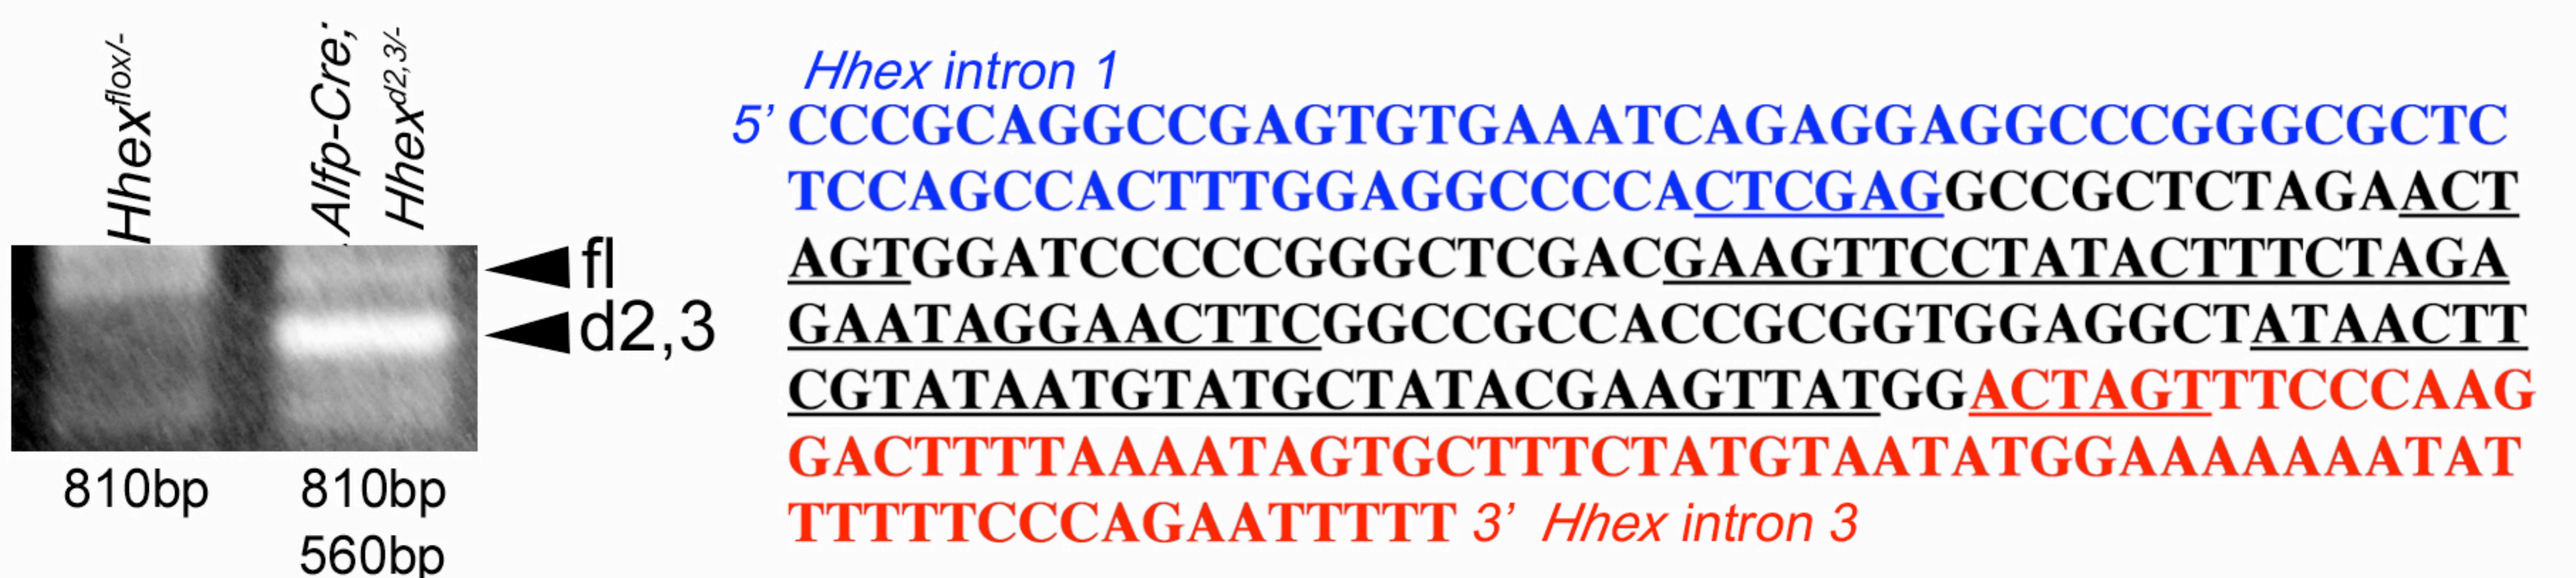

Supplement: NIHMS29111-supplement-01.pdf [file NIHMS29111-supplement-01.pdf]
